# FANCM-family branchpoint translocases remove co-transcriptional R-loops

Charlotte Hodson<sup>1^</sup>, Julianne J O'Rourke<sup>1,2</sup>, Sylvie van Twest<sup>1</sup>, Vincent J Murphy<sup>1</sup>, Elyse Dunn<sup>1</sup> and Andrew J Deans<sup>\*1,2</sup>.

<sup>1</sup>Genome Stability unit, St. Vincent's Institute of Medical Research, Fitzroy, Victoria, Australia

<sup>2</sup>Department of Medicine (St Vincent's Health), University of Melbourne, Fitzroy, Victoria, Australia

\* Corresponding author [adeans@svi.edu.au](mailto:adeans@svi.edu.au)

<sup>^</sup>current address: Astex Pharmaceuticals, 436 Cambridge Science Park, Milton Road, Cambridge, United Kingdom.

## Abstract

Co-transcriptional R-loops arise from physiological or aberrant stalling of RNA polymerase, leading to formation of stable DNA:RNA hybrids. Unresolved R-loops can promote genome instability. Here, we show that the Fanconi anemia- and breast cancer-associated FANCM protein can directly unwind DNA-RNA hybrids from co-transcriptional R-loops *in vitro*. FANCM processively unwinds both short and long R-loops, irrespective of sequence, topology or coating by replication protein A. R-loops can also be unwound in the same assay by the yeast and bacterial orthologs of FANCM, Mph1 and RecG, indicating an evolutionary conserved function. Consistent with this biochemical activity of FANCM, we show that FANCM deficient cells are sensitive to drugs that stabilize R-loop formation. **Our work reveals a mechanistic basis for R-loop metabolism that is critical for genome stability.**

# 1 Introduction

2 R-loops form when RNA anneals within duplex DNA, and displaces a corresponding single-  
 3 strand DNA (ssDNA) patch. R-loops can arise directly, from transcription of difficult to transcribe  
 4 regions, or by enzyme driven integration of RNA, such as R-loops created by the Cas9 protein  
 5 during CRISPR (Ginno *et al*, 2012, Szczelkun *et al*, 2014). Persistent R-loops can be a threat to  
 6 genome stability because the displaced ssDNA within an R-loop is prone to cleavage by  
 7 nucleases (creating DNA breaks)(Arudchandran *et al*, 2004), recombination with distant DNA  
 8 sequences (creating chromosome rearrangements)(Huertas & Aguilera, 2003) and atypical  
 9 modification by ssDNA viral defence proteins such as APOBEC enzymes (creating base  
 10 substitutions)(Sollier & Cimprich, 2015).

11 Several studies have shown DNA replication-dependent genome instability is partially  
 12 prevented when the rate of transcription is reduced, indicating that R-loops cause DNA damage  
 13 predominantly during S phase (Hamperl *et al*, 2017, Helmrich *et al*, 2011, Schwab *et al*, 2015).  
 14 In particular, the Fanconi anemia (FA) DNA repair pathway is activated by R-loop accumulation,  
 15 culminating in formation of monoubiquitinated FANCD2 at R-loop rich regions (Garcia-Rubio *et*  
 16 *al*, 2015, Madireddy *et al*, 2016, Schwab *et al*, 2015). As FANCD2 monoubiquitination is  
 17 normally activated by direct barriers to the replication machinery (such as DNA double strand  
 18 breaks or interstrand crosslinks) (Deans & West, 2011), R-loops most likely also activate the FA  
 19 pathway by blocking DNA replication. In support of this hypothesis, accumulation of  
 20 monoubiquitinated FANCD2 during normal replication (but in the absence of exogenous DNA  
 21 damage) is suppressed by over-expression of RNaseH1 (Madireddy *et al*, 2016, Schwab *et al*,

2015). This nuclease specifically removes DNA:RNA hybrids in the nucleus (Nakamura *et al*, 1991).

FANCM is a component of the FA pathway that is essential for activation of FANCD2 ubiquitination (Coulthard *et al*, 2013), but also has additional FA pathway-independent functions. These include direct remodeling of DNA replication fork structures, recruitment of DNA repair complexes, activation of the ATR checkpoint pathway and suppression of meiotic crossovers (Collis *et al*, 2008, Crismani *et al*, 2012, Deans & West, 2009, Gari *et al*, 2008a). We recently reported elevated formation of R-loops in FANCM-defective cells (Schwab *et al*, 2015). This was not because of increased transcription, but because of failure to properly remove R-loops (Schwab *et al*, 2015). Similarly, R-loops accumulate at telomeres after FANCM depletion, particularly in cells that utilize the ALT pathway of telomere maintenance (Pan *et al*, 2017). As such, FANCM may also prevent accumulation of DNA:RNA hybrids by the TERRA long non-coding RNA, which is essential for maintenance of ALT (Arora *et al*, 2014).

FANCM is a functional ortholog of the yeast Mph1 and Fml1 branchpoint translocase proteins (Whitby, 2010). Like these enzymes, FANCM contains an N-terminal SF2 helicase domain whose ATPase activity is activated only by branched DNA molecules (such as those found at stalled DNA replication or transcription bubbles) (Coulthard *et al*, 2013), and can translocate replication forks and Holliday junction DNA structures. Here we show for the first time that FANCM, and its yeast homolog Mph1, are also efficient in R-loop processing. Like for the bacterial RecG protein (Hong *et al*, 1995, Vincent *et al*, 1996), this function depends upon ATP hydrolysis and involves branch migration, to directly remove RNA trapped in co-transcriptionally formed R-loops.

43 FANCM can unwind R-loops of different size and sequence, including a highly stable R-loop  
 44 formed by transcription across a telomeric repeat. Importantly, we also show that FANCM  
 45 deficient cells, but not those lacking another FA group member, are highly sensitive to small  
 46 molecule drugs that promote R-loop formation.

## Results

### *In vitro* unwinding of co-transcriptional R-loops by the FANCM-FAAP24 complex

We previously showed that FANCM can unwind DNA:RNA hybrids within a homologous duplex (Schwab *et al*, 2015), a property it shares with other human enzymes such as BLM and replicative helicases (Chang *et al*, 2017, Shin & Kelman, 2006). Because this type of structure may not accurately represent the formation of a co-transcriptional R-loop, we set about establishing a more sophisticated substrate that contains the high GC skew, closed triplex structure and longer length of native R-loops (Ginno *et al*, 2013). To do this we used a pUC19 plasmid containing the mouse immunoglobulin class switch recombination sequence ( $\mu$  region) in between a T7 promotor and terminator (Supplemental Figure 1a). Using T7 polymerase and  $^{32}\text{P}$ -UTP we generated co-transcriptional R-loops using techniques previously described by Roy *et al* (Roy *et al*, 2008), where the formation of R-loops can be measured by both a change in plasmid mobility, and retention of the radiolabeled nascent RNA (Figure 1a). Treatment with RnaseH but not Rnase A led to loss of the R-loop structure on the gel, and loss of signal on autoradiographs, confirming the presence of RNA-DNA hybrids within the plasmids (Figure 1b lane4). RNase H degraded the RNA molecule down to nucleotide sized fragments, however addition of FANCM (in heterodimer with its stabilization partner FAAP24) led to release of the RNA transcript without degradation (Figure 1c). This process was ATP dependent: the R-loop remained intact when wild-type FANCM:FAAP24 was added in the absence of ATP (Figure 1c, lane 3) or when the ATPase dead FANCM mutant complex FANCM<sup>K117R</sup>-FAAP24 was used (Figure 1c). We also tested whether other members of the FA pathway could act on R-

loops, given that *in vivo* studies suggest the entire FA pathway (Supplemental Figure 2a) may be required for R-loop regulation (Garcia-Rubio *et al*, 2015, Schwab *et al*, 2015). No component of the FA core complex of proteins, or the FANCI:FANCD2 heterodimer had any direct effect on co-transcriptional R-loops in our assay. Under these experimental conditions only the FANCM-FAAP24 complex can unwind an R-loop structure. (Supplemental Figure 2b).

### **FANCM-FAAP24 unwinding of co-transcriptional R-loops is processive and not blocked by RPA binding**

*In vivo*, ssDNA displaced within an R-loop is most likely bound by ssDNA binding proteins such as Replication Protein A (RPA), to protect it from attack by DNA modifying enzymes (Nguyen *et al*, 2017). To determine whether FANCM-FAAP24 could still unwind R-loops in which the displaced strand is coated in RPA filament, we incubated plasmid R-loops with molar excess of RPA for 15 minutes prior to adding FANCM-FAAP24. As expected, a uniform shift in electrophoretic mobility was observed when the displaced DNA strand in the R-loop became bound by RPA (Figure 2a). After addition of FANCM-FAAP24, 70% of the RPA bound R-loops were unwound within 5 minutes, whereas 92% of uncoated R-loops were unwound. By 10 minutes, almost all of the uncoated R-loops and approximately 85% of RPA bound R-loops were unbound (Figure 2b-c). This observation was not due to addition of extra protein to the reaction because high concentrations of Bovine Serum Albumin (BSA) did not cause an effect (Supplemental Figure 3). Together, these data suggest FANCM-FAAP24 acts in a processive manner on both naked and RPA-coated R-loops, and that RPA has a slight inhibitory effect on the unwinding ability of FANCM.

89

## 90 **FANCM-FAAP24 can unwind R-loops of different topology**

91 Topological changes in DNA occur during the formation of R-loops, because the bound RNA  
 92 creates underwound or overwound (supercoiled) regions. Topological effects may both  
 93 promote R-loop formation during transcription (El Hage *et al*, 2010, Powell *et al*, 2013) or  
 94 prevent R-loop removal, including by FANCM or other enzymes. To test this, we first assessed  
 95 whether our purified plasmid R-loops were stable upon induction of topological change. As  
 96 linearization removes all covalent topology from DNA, we treated our plasmid R-loops with  
 97 restriction enzymes *EcoRI* and *HindIII*. We found that linearization had no effect on R-loop  
 98 stability (Figure 3a). Second, R-loops were also stable in a un-super-coiled covalently closed  
 99 circular (ccc) plasmid generated by *E.coli* Topo1 or human Topoisomerase III $\alpha$ :RMI1:RMI2  
 100 complex, with which FANCM associates in cells (Deans & West, 2009) (Figure 3a). Together,  
 101 these data show that once formed, transcriptional R-loop structures are stable regardless of  
 102 changes in DNA topology. These observations and others (Wilson-Sali & Hsieh, 2002) support  
 103 the idea that type I topoisomerase role in transcription is in prevention of R-loop formation, but  
 104 not the direct removal of RNA trapped within an R-loop.

105 We next tested the ability of FANCM-FAAP24 to unwind the topologically distinct R-loop forms.  
 106 In time course assays, FANCM showed no preference in activity towards either supercoiled,  
 107 linear or ccc R-loops (Figure 3b-c) unwinding all at essentially equal rates. This suggests that  
 108 DNA topology does not affect R-loop unwinding activity of FANCM against a native R-loop  
 109 structure.

110

# 111 **FANCM-FAAP24 R-loop unwinding activity is sequence and length independent**

112 R-loops accumulate in different regions of the genome including highly transcribed genes, GC-  
 113 skewed promoters and telomeric repeats (Arora *et al*, 2014, Ginno *et al*, 2012, Powell *et al*,  
 114 2013). To test whether R-loop processing by FANCM showed any sequence preference, we  
 115 tested several sequences that were previously demonstrated to be strongly R-loop prone  
 116 (Ginno *et al*, 2012). These sequences include the human *APOE* or *SNRPN* and mouse *Airn*  
 117 genomic loci, which we cloned into our *in vitro* R-loops test plasmid (Supplementary Figure 1).  
 118 These regions were assessed for their percentage of GC skew using *genskew.csb.univie.ac.at*  
 119 (Figure 4a). All were unwound rapidly and efficiently by FANCM:FAAP24 (Figure 4a). FANCM  
 120 could also remove R-loops formed by transcription through the telomeric repeat sequence,  
 121 otherwise known as TERRA transcripts (Figure 4b). These R-loops have previously been shown  
 122 to have a strong G-quadruplex forming ability (Martadinata & Phan, 2013), suggesting that  
 123 FANCM's R-loop processing capability extends to R-loops that contain G-quadruplexes either  
 124 within the displaced strand or between the RNA and the displaced strand (Arora *et al*, 2014),  
 125 and supports a role for FANCM in the TERRA-dependent maintenance of telomeres by the ALT  
 126 pathway of telomere maintenance (Lee *et al*, 2014, Pan *et al*, 2017).

127 As R-loops of greater than 600bp can be detected in a cellular context (Ginno *et al*, 2012) we  
 128 examined whether FANCM-FAAP24 could processively unwind R-loops containing different  
 129 lengths of RNA. To do this we generated a plasmid containing ~1148bp of repeats of the  
 130 immunoglobulin class switch  $\mu$  sequence (Supplementary Figure 1) downstream of a T7



promoter. We compared the size of RNA trapped within these R-loops to those found in the standard R-loop (consisting of a single  $\mu$  repeat of 143 bp) by subjecting the purified R-loops to Urea-PAGE. Denaturation revealed multiple RNA species of different lengths within the population of R-loops (Fig.4c). One explanation for this observation is that RNase A could cleave unpaired single strand regions within a longer R-loop, hence making the actual hybrid pieces appear shorter. Alternatively, T7 RNA polymerase could be stalling stochastically at different points along the template. Importantly though, the RNA fragments between the standard and long R-loops gave different average sizes of ~150 and ~300 nucleotides respectively (Figure 4c). We could therefore compare the rate of unwinding on R-loops of similar sequence but different length. Using the defined conditions of this assay FANCM-FAAP24 can unwind 100% of short plasmid R-loops within 5 minutes, with ~55% unwinding occurring within the first minute (Figure 4d). In contrast FANCM-FAAP24 takes 10 minutes to achieve ~85% unwinding of longer plasmid R-loops, a similar rate of unwinding when corrected for length (Figure 4d).

Collectively, these data further support the concept that FANCM:FAAP24 traverses long tracks of DNA without dissociation (i.e. processivity), to remove RNA molecules trapped within extended R-loop sequences.

## **R-loop displacement is a conserved feature of FANCM family proteins**

FANCM protein is a 230kDa protein, with an N-terminal translocase domain, a C-terminal ERCC4 structure specific DNA binding domain, and multiple protein:protein interaction domains that

recruit additional DNA repair factors (Blackford *et al*, 2013, Coulthard *et al*, 2013, Deans & West, 2009) (Figure 5a). Only the N-terminal translocase domain is conserved in homologs from lower eukaryotes, such as Mph1 from *Saccharomyces cerevisiae*, and Fml1 from *S. pombe* (Whitby, 2010). RecG proteins are thought to be the closest relatives of FANCM/Mph1/Fml1 in bacteria (Gari *et al*, 2008a, Sun *et al*, 2008). To test whether R-loop unwinding is a conserved feature of these “FANCM family” members we purified recombinant *S.cerevesae* Mph1 *S.pombe* Fml1 or *Thermatoga maritima* RecG and tested their activity against our co-transcriptional R-loops (Figure 5b). RecG has previously been demonstrated to unwind synthetic linear R-loops (Vincent *et al*, 1996) but Mph1 and Fml1 have never been tested. Further data, collected using a FANCM fragment (aa 1-800), revealed the N-terminal conserved translocase domain of FANCM is sufficient for *in vitro* R-loop removal (Figure 5c). All of these enzymes displaced the co-transcriptional R-loops with similar activity, indicating a conserved function of FANCM-family proteins.

FANCM protein (and Mph1 and RecG (McGlynn *et al*, 1997, Prakash *et al*, 2009)) can also unwind D-loops, which share structural similarities with R-loops (see Discussion). D-loop formation is an intermediate in DNA repair by homologous recombination which requires RAD51 or RecA recombinase. In addition to FANCM-family members, the RecQ helicase BLM (mutated in Bloom’s Syndrome) can unwind D-loops (Bachrati *et al*, 2006). We therefore tested BLM for its ability to unwind co-transcriptional R-loops. We carried out the assay with increasing amounts of BLM (Figure 5d). While BLM protein could unwind a very small fraction of the plasmid R-loops at high molar ratios of enzyme to plasmid (highest concentration 40nM, to 1nM substrate), it did this very slowly compared to FANCM:FAAP24, which rapidly unwound R-

loops at stoichiometric and sub-stoichiometric concentrations (1nM for Figure 5d). In contrast to its much lower activity towards R-loop substrates, BLM was as efficient as FANCM in assays using a plasmid D-loop substrate (Supplemental Figure 4). These data suggest that BLM is capable of unwinding R-loop structures, but unlike for FANCM, they are not its preferred catalytic substrate.

# **FANCM KO cells but not FANCL KO cells are sensitive to agents that induce R-loop stabilization**

We recently demonstrated that FANCM knockout cells, or those expressing a translocation deficient FANCM<sup>K117R</sup> mutant protein, accumulate excessive R-loops under normal cell culture growth conditions (Schwab *et al*, 2015). Several chemicals have also been shown to increase R-loop prevalence, each by a different mechanism. These include inhibitors of the spliceosome (that promote R-loops through retention of intronic sequences), topoisomerase 1 inhibitors such as topotecan (that promote R-loops by stalling transcription), and reactive aldehydes (unknown mechanism) (Powell *et al*, 2013, Schwab *et al*, 2015, Wan *et al*, 2015). We used isogenic FANCM KO, FANCL KO or parental HCT116 cells (previously characterized by Wang *et al* (Wang *et al*, 2013)) and tested their sensitivity to increasing concentrations of these R-loop promoting compounds. We found that FANCM deficient cells are particularly sensitive to topotecan and the spliceosome inhibitor pladienolide B, while FANCL-deficient cells are not (Figure 6a-b). Both FANCM and FANCL deficient cells are exquisitely sensitive to acetyl aldehyde, which also generates DNA interstrand crosslink damage in addition to R-loop accumulation.

194 Importantly, sensitivity to both topotecan and pladienolide B correlated with an inflection point  
 195 in total cellular R-loop levels in response to these drugs. This was measured by slot blot of  
 196 genomic DNA probed with anti-DNA:RNA hybrid monoclonal antibody S9.6 (Figure 6c-d). R-loop  
 197 levels and LD50 dosage were highly related, and suggests that cellular viability in response to  
 198 these compounds correlates with a threshold R-loop level. This maximum tolerated level is  
 199 reached with lower doses of either topotecan or pladienolide B in FANCM-deficient cells. This  
 200 result indicates that R-loop metabolism requires FANCM activity independent of the other FA  
 201 ICL repair proteins, to catalytically unwind R-loops formed under both physiological and drug-  
 202 induced conditions.

## 203 Discussion

204 Even though FANCM contains a SF2 helicase domain, exhaustive investigations have never  
 205 uncovered a direct helicase activity of the protein against any DNA substrate (Coulthard *et al*,  
 206 2013, Gari *et al*, 2008a, Gari *et al*, 2008b, Meetei *et al*, 2005, Mosedale *et al*, 2005, Whitby,  
 207 2010, Xue *et al*, 2008). Instead, FANCM is thought to act on junctions in DNA as a branch point  
 208 translocase (Gari *et al*, 2008a, Gari *et al*, 2008b). In this manner, it utilizes its ATP-dependent  
 209 motor to reanneal DNA and further displace annealed strands ahead of the junction, without  
 210 directly acting to unwind DNA like a helicase. This has been proposed for two different DNA  
 211 structures: (i) stalled replication forks, whereby the annealing of nascent DNA strands by  
 212 FANCM catalyzes replication fork reversal and the formation of a chicken foot structure and (ii)  
 213 during recombination and D-loop formation, FANCM can catalyze displacement of the invading  
 214 structure (Figure 7). Both of these activities have also been described for yeast Mph1 and  
 215 bacterial RecG (McGlynn *et al*, 1997, Muller & West, 1994, Prakash *et al*, 2009). We propose a  
 216 similar function for FANCM, Mph1 and RecG at R-loops at stalled transcription complexes. The  
 217 branchpoint of all three structures, and the catalytic mechanism required for their  
 218 translocation, is identical. In the case of stalled replication forks, FANCM creates the substrate  
 219 necessary for resumption of replication (Gari *et al*, 2008a). But for D-loops and R-loops, FANCM  
 220 is acting to suppress illegitimate recombination and/or barriers to DNA replication and  
 221 transcription.

222 R-loop branch migration does not appear to be a general property of all translocases and  
 223 helicases. For example, another SF2 helicase, BLM, can displace RNA from the R-loop, but only

weakly when used at high concentration; similar to observations made for the bacterial enzyme RuvAB (Vincent *et al*, 1996). Like RuvAB, BLM is able to act to directly unwind DNA:RNA heteroduplexes constructed from synthetic oligonucleotides (Chang *et al*, 2017, Popuri *et al*, 2008), but these contained heterologous base-pairing, or extensive ssDNA regions that are not present in “native” co-transcriptional R-loops. The weak activity of BLM at high enzyme to substrate ratios (40:1, Figure 5d) on co-transcriptional R-loops, is probably the result of “accidental” helicase activity with the R-loop as the protein moves along double stranded DNA (Cheok *et al*, 2005), rather than the direct branch migration mechanism proposed for FANCM, Fml1, Mph1 and RecG. Future work should also compare the activity of FANCM to that of other proposed R-loop metabolizing enzymes such as Senataxin (Yuce & West, 2013), Aquarius (Sollier *et al*, 2014) and DHX9 (Chakraborty & Grosse, 2011). It should be noted that none of these enzymes in purified form have been directly tested for activity on co-transcriptional R-loops.

But what is the nature of R-loops that are acted upon by FANCM? R-loops can form at multiple different loci. Indeed, mathematical modeling suggests that every transcribed region is able to form an R-loop, but that increased observation at some loci comes from the fact that particular sequences are more prone to their formation, such as G-rich sequences (Belotserkovskii *et al*, 2017). Another consequence paradoxically, is that within a cell population, highly transcribed genes are more likely to be discovered in an R-loop-bound, arrested state. In this study, we have shown that FANCM can displace RNA from all co-transcriptional R-loops tested, including those that are long and those with very high G-content. FANCM therefore has the potential to act upon any R-loop in the genome. This might include R-loops required to initiate class switch

recombination at the immunoglobulin heavy chain locus in activated B cells, which regulates immune function and occurs during G1 phase of the cell cycle (Schrader *et al*, 2007). Some FA mouse models show minor class switching defects (Nguyen *et al*, 2014), although *Fanccm*-deficient mice have not been tested in this respect (Singh *et al*, 2009). We favor the hypothesis that FANCM's R-loop regulation activity concerns their removal ahead of, or encountered by, the replication fork. This is because overwhelming evidence points to a role for the Fanconi anemia pathway in DNA damage during S phase (Deans & West, 2011) and the fact that FANCM protein is enriched in chromatin at sites of ongoing replication (Blackford *et al*, 2013, Castella *et al*, 2015). But DNA:RNA hybrids were also recently shown to form by transcription from dsDNA breaks during resection, when RNA polymerases become loaded onto broken DNA ends (Ohle *et al*, 2016). FANCM may play some role in displacing such hybrids in prevention of over-resection, another phenotype of FANCM-deficient cells (Blackford *et al*, 2013).

Finally, the maintenance of telomeres is also regulated by R-loops in some cancers (Azzalin *et al*, 2007). TERRA transcripts are produced by transcription of the C-rich telomeric DNA strand and are essential for the ALT mechanism of telomere maintenance by recombination. FANCM is necessary for ALT (Pan *et al*, 2017), and it is possible that this is because it acts on TERRA transcripts to permit telomere replication or somehow regulate telomere recombination. Our *in vitro* experiments demonstrate that FANCM displaces the G-quadruplex stabilized TERRA transcripts as efficiently as it acts on promoter- or switch-region- based R-loops.

While several physiological R-loops may be targeted by FANCM activity, it is also clear that chemically induced (or pathological) R-loops accumulate more rapidly, and for longer periods,

in FANCM-deficient cells (Figure 6). In particular, R-loop promoting inhibitors of topoisomerase 1 or splicing promote R-loop accumulation at lower concentrations in FANCM-knockout cells, and this correlates with increased cell death induced by these drugs. Camptothecin sensitivity was also observed in cells from *Fancm*-deficient mice (Bakker *et al*, 2009), Mph1 deficient yeast (Scheller *et al*, 2000) and RecG deficient bacteria (Sutherland & Tse-Dinh, 2010). Such sensitivity is not a common property of homologous recombination deficiency, but is seen for a subset of HR proteins that also play a role in R-loop metabolism, such as BRCA1 and BRCA2 (Bhatia *et al*, 2014, Hill *et al*, 2014). Recent evidence suggests that transcription replication collisions promoted by splicing inhibitors or topoisomerase poisons could provide a major mechanism for the therapeutic action of these drugs (Sollier & Cimprich, 2015). As such, FANCM-deficiency or FANCM-overexpression could modulate the tumour and normal cellular response to these drugs in clinical use.

In conclusion, our biochemical reconstitution of co-transcriptional R-loop formation has established branch point translocation as a major mechanism of R-loop release. Given the emerging role of R-loops in cancer (Sollier & Cimprich, 2015, Stork *et al*, 2016), it is possible that a defect in FANCM mediated R-loop metabolism is directly responsible for the tumour prone phenotype of *FANCM*-associated Fanconi anaemia (homozygous mutations) and familial breast cancer (heterozygous carriers). The highly processive *in vitro* activity of FANCM, and strong R-loop phenotype after treatment with various chemotherapy drugs is consistent with an important role for processing of R-loops by FANCM in human disease.



## 288 **Methods**

### 289 **Co-transcriptional R-loop plasmid design and construction**

290 Co-transcriptional R-loop sequences for the human APOE or SNRPN promoter sequences or  
 291 murine  $\mu$ -switch repeat or AIRN promoter sequences were synthesized with a 5'-flanking T7  
 292 promoter and 3'-T7-terminator sequence and cloned into the EcoRI and HindIII sites of pUC19  
 293 (followed by sequence verification) by General Biosystems (Sequences are provided in  
 294 Supplemental Figure 3). To generate the longer R-loop plasmid (pUC19 SR long), successive  
 295 rounds of restriction cloning was undertaken to concatemerize the  $\mu$ -switch repeat through  
 296 repetitive subcloning of AvrII/HindIII digested fragments into SpeI/HindIII digested pUC19-SR.  
 297 Plasmids were transformed into NEB 10-beta cells (NEB), plated and midi prepped (Qiagen).  
 298 DNA concentration was established by nanodrop. R-loop forming plasmids have been deposited  
 299 at Addgene. pcDNA6-Telo and TeloR contain a 0.8 kb fragment of human telomeric repeat  
 300 cloned downstream of a T7 promoter (Arora *et al*, 2014).

### 301 **R-loop generation and purification**

302 2 $\mu$ g of plasmid DNA was incubated in a final reaction volume of 200 $\mu$ l containing 1x T7  
 303 polymerase reaction buffer (NEB), 25 units of T7 polymerase (NEB), 2.25mM of each nucleotide  
 304 CTP, GTP, ATP and 825nM UTP- $\alpha$ -<sup>32</sup>P 3000 Ci/mmol (Perkin Elmer) for 1 hour at 37°C. The  
 305 reaction was stopped by heat denaturation at 65°C for 20mins. 100 $\mu$ l of 1.05M NaCl and 0.03M  
 306 MgCl<sub>2</sub> buffer was added to each reaction plus 2.5 $\mu$ g of Rnase A (EpiCentre) for 1hr at 37°C. R-  
 307 loops were then purified by 2x phenol/chloroform using phase lock tubes (Quanta Bio),  
 308 precipitated in a final concentration of 0.3M Na Acetate and 70% ethanol at -20°C overnight.  
 309 Next day the samples were centrifuged at 13,000 x g in table top centrifuge for 30min.

Supernatant was removed and samples were washed with 70% ethanol and centrifuged for a further 10min. Supernatant was removed and pellets were left to air dry. R-loops were resuspended in 10mM Tris pH8, then ran through 2x S-400 columns (GE Healthcare) to remove unincorporated nucleotides, quantified using nanodrop and stored at 4°C.

# **Protein Purification**

The following were purified as previously described: FLAG-FANCM-FAAP24 and FLAG-FANCM<sub>K117R</sub>-FAAP24 (Coulthard *et al*, 2013), RPA (Henricksen *et al*, 1994), RecG (Singleton *et al*, 2001) (a kind gift of Steve West, Francis Crick Institute), Flag-BLM, Flag-Mph1 and Flag-Topoisomerase III $\alpha$ -RMI1-RMI2 expression vectors were cloned into pFL or pUCDM baculovirus vectors and subsequently integrated into the Multibac Bacmid (Berger *et al*, 2004). For these proteins, 1L High 5 *Trichoplusia ni* cells ( $1 \times 10^6$ /ml, Invitrogen) were infected with virus (MOI=2.5). Cells were harvested 72 hours after infection at 500 x *g*, 4°C and pellets washed with 1xPBS. Cells were lysed on ice in 0.5M NaCl, 0.02M TEA pH 7.5, 1mM DTT, 10% glycerol plus mammalian protease inhibitors (Sigma P8340-5ml) and sonicated on ice 5x 10 sec bursts. Lysates was clarified by centrifugation at 35,000G for 40 minutes at 4°C. Clarified supernatant was then incubated with equilibrated Flag M2 resin (Sigma) for 1hr on a roller at 4°C. Flag resin was then subjected to 4x batch washes with lysis buffer (without mammalian protease inhibitors) with 5 minutes on a roller at 4°C between each spin. The resin was then placed into gravity flow column for a final wash and protein was eluted with 100 $\mu$ g/ml Flag peptide. Flag-Mph1 and Flag-FANCM-FAAP24 complexes were subjected to further purification by ssDNA affinity resin (Sigma): Flag elutions containing FANCM were pooled and diluted to have a final concentration of 100mM NaCl, 20mM TEA pH7.5, 10% glycerol, 1mM DTT (buffer B) and added

to 400μl ssDNA resin overnight on a roller at 4°C. The resin was then placed down gravity flow column and washed with 10CV of buffer B. FANCM-FAAP24 complexes were eluted with buffer B containing 0.5M NaCl. Proteins were quantified using BSA titrations on SDS-PAGE gels. All proteins were flash frozen in their final buffers and stored at -80°C. Topoisomerase I from *E.coli* and all restriction enzymes were purchased from New England Biolabs.

### **R-loop unwinding assays**

R-loop unwinding reactions (10μl) contained 1nM of R-loop, 1mM ATP, 2μl of protein (protein concentrations stated in main text) in R-loop buffer (6.6mM Tris pH7.5, 3% glycerol, 0.1mM EDTA, 1mM DTT, 0.5mM MgCl<sub>2</sub>) and incubated at 37°C for time as shown in figures. Reactions were stopped by adding 2μl of stop buffer (10mg.ml<sup>-1</sup> proteinase K (NEB), 1% SDS) and incubated for 15min at 37°C. 2μl of 50% glycerol was added to samples prior to loading onto 1% or 0.8% agarose TAE gels, run at 100V in TAE buffer (40mM Tris, 20mM acetic acid, 1mM EDTA) for 60-90 mins. Gels were then crushed between precut biodyene B membranes (Pall) for 1hour, exposed overnight to a GE phosphor-screen and imaged on a Typhoo scanner (GE Biosciences). To visualize DNA, agarose gels were post stained with Sybr gold (Thermofisher) 1 in 10,000 in TAE.

Quantification of R-loop unwinding was performed using Image J and Prism software.

### **Cell based assays**

HCT116- or FANCM-/- and FANCL-/- derivatives were provided by Lei Li (University of Texas MD Anderson). Cell lines were authenticated by G-banding (St Vincent's Cytogenetics) and maintained in DMEM + 10% fetal bovine serum at 37°C, 5% CO<sub>2</sub> in a humidified chamber. For drug sensitivity assays, cells were plated in 96-well plates at 1,500 cells/well, then treated 24hrs

later with various concentrations of topotecan (aka Hycamptin®, GSK) or pladienolamide B (Calbiochem). After 72hr, survival was measured using sulforhodamine B assay read at 550nm on a EnSpire Plate reader (Perkin Elmer).

To measure total cellular R-loop levels, HCT116 cells were treated with drug or vehicle for 4hr. Total genomic DNA was extracted using Isolate II kit (Bioline). 1µg of genomic DNA was slot blotted, using a BioRad Microfiltration apparatus, onto Biotrans B Nylon membrane (Thermo Fisher), which was then air-dried and blocked in Odyssey blocking buffer (LiCor). The membrane was then probed with 0.5µg/mL S9.6 anti-DNA:RNA monoclonal antibody (produced and purified in house from S9.6 hybridoma (ATCC)) and 10ng/ml anti-ssDNA (F7-26, Millipore). Atto800-anti-mouse (LiCor) and Cy5-conjugated anti-IgM antibody (Millipore) were used to visualize the level of DNA:RNA hybrids and total DNA detected by the primary antibodies, and visualized and quantified using Odyssey LiCor dual color imaging system and accompanying software.

## Author contributions

Conceptualization, C.H., J.J.O, and A.J.D.; Methodology, C.H., J.J.O., S.v.T., V.J.M., and A.J.D.; Investigation, all authors.; Writing - Original Draft, C.H. and A.J.D.; Writing - Review & Editing C.H., J.J.O, E.D. and A.J.D.; Funding Acquisition, A.J.D.; and Supervision, C.H., and A.J.D.

## Acknowledgements

We thank members of the Genome Stability Unit for input and discussions, and Jörg Heierhorst, Wayne Crismani and Wojciech Niedzwiedz for comments and suggestions on the manuscript.

Thanks to Claus Azzalin for providing telomeric repeat plasmids, Lei Li for providing the HCT116

376 cell lines and Steve West for RecG. AJD is a Victorian Cancer Agency fellow, JJO received  
 377 scholarship from the Leukaemia Foundation (Australia). This work was funded by National  
 378 Health and Medical Research Council Australia (grants 1123100 and 1126004), Cancer Council  
 379 of Victoria, Buxton trust and the Victorian Government's OIS Program.

## References

- Arora R, Lee Y, Wischniewski H, Brun CM, Schwarz T, Azzalin CM (2014) RNaseH1 regulates TERRA-telomeric DNA hybrids and telomere maintenance in ALT tumour cells. *Nat Commun* 5: 5220
- Arudchandran A, Bernstein RM, Max EE (2004) Single-stranded DNA breaks adjacent to cytosines occur during Ig gene class switch recombination. *J Immunol* 173: 3223-9
- Azzalin CM, Reichenbach P, Khorauli L, Giulotto E, Lingner J (2007) Telomeric repeat containing RNA and RNA surveillance factors at mammalian chromosome ends. *Science* 318: 798-801
- Bachrati CZ, Borts RH, Hickson ID (2006) Mobile D-loops are a preferred substrate for the Bloom's syndrome helicase. *Nucleic Acids Research* 34: 2269-2279
- Bakker ST, van de Vrugt HJ, Rooimans MA, Oostra AB, Steltenpool J, Delzenne-Goette E, van der Wal A, van der Valk M, Joenje H, te Riele H, de Winter JP (2009) Fancm-deficient mice reveal unique features of Fanconi anemia complementation group M. *Hum Mol Genet* 18: 3484-95
- Belotserkovskii BP, Soo Shin JH, Hanawalt PC (2017) Strong transcription blockage mediated by R-loop formation within a G-rich homopurine-homopyrimidine sequence localized in the vicinity of the promoter. *Nucleic Acids Res*
- Berger I, Fitzgerald DJ, Richmond TJ (2004) Baculovirus expression system for heterologous multiprotein complexes. *Nature biotechnology* 22: 1583-7
- Bhatia V, Barroso SI, Garcia-Rubio ML, Tumini E, Herrera-Moyano E, Aguilera A (2014) BRCA2 prevents R-loop accumulation and associates with TREX-2 mRNA export factor PCID2. *Nature* 511: 362-5
- Blackford AN, Schwab RA, Nieminuszczy J, Deans AJ, West SC, Niedzwiedz W (2013) The DNA translocase activity of FANCM protects stalled replication forks. *Hum Mol Genet* 21: 2005-16
- Castella M, Jacquemont C, Thompson EL, Yeo JE, Cheung RS, Huang JW, Sobeck A, Hendrickson EA, Taniguchi T (2015) FANCI Regulates Recruitment of the FA Core Complex at Sites of DNA Damage Independently of FANCD2. *PLoS Genet* 11: e1005563
- Chakraborty P, Grosse F (2011) Human DHX9 helicase preferentially unwinds RNA-containing displacement loops (R-loops) and G-quadruplexes. *DNA Repair (Amst)* 10: 654-65
- Chang EY, Novoa CA, Aristizabal MJ, Coulombe Y, Segovia R, Chaturvedi R, Shen Y, Keong C, Tam AS, Jones SJM, Masson JY, Kobor MS, Stirling PC (2017) RECQ-like helicases Sgs1 and BLM regulate R-loop-associated genome instability. *J Cell Biol* 216: 3991-4005
- Cheok CF, Wu L, Garcia PL, Janscak P, Hickson ID (2005) The Bloom's syndrome helicase promotes the annealing of complementary single-stranded DNA. *Nucleic Acids Res* 33: 3932-41
- Collis SJ, Ciccio A, Deans AJ, Horejsi Z, Martin JS, Maslen SL, Skehel JM, Elledge SJ, West SC, Boulton SJ (2008) FANCM and FAAP24 function in ATR-mediated checkpoint signaling independently of the Fanconi anemia core complex. *Mol Cell* 32: 313-24
- Coulthard R, Deans A, Swuec P, Bowles M, Costa A, West S, Costa A, McDonald NQ (2013) Architecture and DNA recognition elements of the Fanconi anemia FANCM-FAAP24 complex. *Structure* 21: 1648-1658
- Crismani W, Girard C, Froger N, Pradillo M, Santos JL, Chelysheva L, Copenhaver GP, Horlow C, Mercier R (2012) FANCM limits meiotic crossovers. *Science* 336: 1588-90
- Deans AJ, West SC (2009) FANCM connects the genome instability disorders Bloom's Syndrome and Fanconi Anemia. *Mol Cell* 36: 943-53

423 Deans AJ, West SC (2011) DNA interstrand crosslink repair and cancer. *Nat Rev Cancer* 11: 467-  
424 80

425 El Hage A, French SL, Beyer AL, Tollervey D (2010) Loss of Topoisomerase I leads to R-loop-  
426 mediated transcriptional blocks during ribosomal RNA synthesis. *Genes Dev* 24: 1546-58

427 Garcia-Rubio ML, Perez-Calero C, Barroso SI, Tumini E, Herrera-Moyano E, Rosado IV, Aguilera A  
428 (2015) The Fanconi Anemia Pathway Protects Genome Integrity from R-loops. *PLoS Genet* 11:  
429 e1005674

430 Gari K, Décaillot C, Delannoy M, Wu L, Constantinou A (2008a) Remodeling of DNA replication  
431 structures by the branch point translocase FANCM. *Proc Natl Acad Sci USA*

432 Gari K, Decaillot C, Stasiak AZ, Stasiak A, Constantinou A (2008b) The Fanconi anemia protein  
433 FANCM can promote branch migration of Holliday junctions and replication forks. *Mol Cell* 29:  
434 141-8

435 Ginno PA, Lim YW, Lott PL, Korf I, Chedin F (2013) GC skew at the 5' and 3' ends of human genes  
436 links R-loop formation to epigenetic regulation and transcription termination. *Genome Res* 23:  
437 1590-600

438 Ginno PA, Lott PL, Christensen HC, Korf I, Chedin F (2012) R-loop formation is a distinctive  
439 characteristic of unmethylated human CpG island promoters. *Mol Cell* 45: 814-25

440 Hamperl S, Bocek MJ, Saldivar JC, Swigut T, Cimprich KA (2017) Transcription-Replication  
441 Conflict Orientation Modulates R-Loop Levels and Activates Distinct DNA Damage Responses.  
442 *Cell* 170: 774-786 e19

443 Helmrich A, Ballarino M, Tora L (2011) Collisions between replication and transcription  
444 complexes cause common fragile site instability at the longest human genes. *Mol Cell* 44: 966-  
445 77

446 Henricksen LA, Umbricht CB, Wold MS (1994) Recombinant replication protein A: expression,  
447 complex formation, and functional characterization. *J Biol Chem* 269: 11121-32

448 Hill SJ, Rolland T, Adelmant G, Xia X, Owen MS, Dricot A, Zack TI, Sahni N, Jacob Y, Hao T,  
449 McKinney KM, Clark AP, Reyon D, Tsai SQ, Joung JK, Beroukhir R, Marto JA, Vidal M, Gaudet S,  
450 Hill DE et al. (2014) Systematic screening reveals a role for BRCA1 in the response to  
451 transcription-associated DNA damage. *Genes Dev* 28: 1957-75

452 Hong X, Cadwell GW, Kogoma T (1995) Escherichia coli RecG and RecA proteins in R-loop  
453 formation. *EMBO J* 14: 2385-92

454 Huertas P, Aguilera A (2003) Cotranscriptionally formed DNA:RNA hybrids mediate transcription  
455 elongation impairment and transcription-associated recombination. *Mol Cell* 12: 711-21

456 Lee M, Hills M, Conomos D, Stutz MD, Dagg RA, Lau LM, Reddel RR, Pickett HA (2014) Telomere  
457 extension by telomerase and ALT generates variant repeats by mechanistically distinct  
458 processes. *Nucleic Acids Res* 42: 1733-46

459 Madireddy A, Kosiyatrakul ST, Boisvert RA, Herrera-Moyano E, Garcia-Rubio ML, Gerhardt J,  
460 Vuono EA, Owen N, Yan Z, Olson S, Aguilera A, Howlett NG, Schildkraut CL (2016) FANCD2  
461 Facilitates Replication through Common Fragile Sites. *Mol Cell* 64: 388-404

462 Martadinata H, Phan AT (2013) Structure of human telomeric RNA (TERRA): stacking of two G-  
463 quadruplex blocks in K(+) solution. *Biochemistry* 52: 2176-83

464 McGlynn P, Al-Deib AA, Liu J, Mariani KJ, Lloyd RG (1997) The DNA replication protein PriA and  
465 the recombination protein RecG bind D-loops. *J Mol Biol* 270: 212-21



466 Meetei AR, Medhurst AL, Ling C, Xue Y, Singh TR, Bier P, Steltenpool J, Stone S, Dokal I, Mathew  
467 CG, Hoatlin M, Joenje H, de Winter JP, Wang W (2005) A human ortholog of archaeal DNA  
468 repair protein Hef is defective in Fanconi anemia complementation group M. *Nat Genet* 37:  
469 958-63

470 Mosedale G, Niedzwiedz W, Alpi A, Perrina F, Pereira-Leal JB, Johnson M, Langevin F, Pace P,  
471 Patel KJ (2005) The vertebrate Hef ortholog is a component of the Fanconi anemia tumor-  
472 suppressor pathway. *Nat Struct Mol Biol* 12: 763-71

473 Muller B, West SC (1994) Processing of Holliday junctions by the Escherichia coli RuvA, RuvB,  
474 RuvC and RecG proteins. *Experientia* 50: 216-22

475 Nakamura H, Oda Y, Iwai S, Inoue H, Ohtsuka E, Kanaya S, Kimura S, Katsuda C, Katayanagi K,  
476 Morikawa K, et al. (1991) How does RNase H recognize a DNA.RNA hybrid? *Proc Natl Acad Sci U*  
477 *S A* 88: 11535-9

478 Nguyen HD, Yadav T, Giri S, Saez B, Graubert TA, Zou L (2017) Functions of Replication Protein A  
479 as a Sensor of R Loops and a Regulator of RNaseH1. *Mol Cell* 65: 832-847.e4

480 Nguyen TV, Riou L, Aoufouchi S, Rosselli F (2014) Fanca deficiency reduces A/T transitions in  
481 somatic hypermutation and alters class switch recombination junctions in mouse B cells. *J Exp*  
482 *Med* 211: 1011-8

483 Ohle C, Tesorero R, Schermann G, Dobrev N, Sinning I, Fischer T (2016) Transient RNA-DNA  
484 Hybrids Are Required for Efficient Double-Strand Break Repair. *Cell* 167: 1001-1013.e7

485 Pan X, Drosopoulos WC, Sethi L, Madireddy A, Schildkraut CL, Zhang D (2017) FANCM, BRCA1,  
486 and BLM cooperatively resolve the replication stress at the ALT telomeres. *Proc Natl Acad Sci U*  
487 *S A*

488 Popuri V, Bachrati CZ, Muzzolini L, Mosedale G, Costantini S, Giacomini E, Hickson ID, Vindigni A  
489 (2008) The Human RecQ helicases, BLM and RECQ1, display distinct DNA substrate specificities.  
490 *J Biol Chem* 283: 17766-76

491 Powell WT, Coulson RL, Gonzales ML, Crary FK, Wong SS, Adams S, Ach RA, Tsang P, Yamada  
492 NA, Yasui DH, Chedin F, LaSalle JM (2013) R-loop formation at Snord116 mediates topotecan  
493 inhibition of Ube3a-antisense and allele-specific chromatin decondensation. *Proc Natl Acad Sci*  
494 *U S A* 110: 13938-43

495 Prakash R, Satory D, Dray E, Papusha A, Scheller J, Kramer W, Krejci L, Klein H, Haber JE, Sung P,  
496 Ira G (2009) Yeast Mph1 helicase dissociates Rad51-made D-loops: implications for crossover  
497 control in mitotic recombination. *Genes Dev* 23: 67-79

498 Roy D, Yu K, Lieber MR (2008) Mechanism of R-Loop Formation at Immunoglobulin Class Switch  
499 Sequences. *Molecular and Cellular Biology* 28: 50-60

500 Scheller J, Schurer A, Rudolph C, Hettwer S, Kramer W (2000) MPH1, a yeast gene encoding a  
501 DEAH protein, plays a role in protection of the genome from spontaneous and chemically  
502 induced damage. *Genetics* 155: 1069-81

503 Schrader CE, Guikema JE, Linehan EK, Selsing E, Stavnezer J (2007) Activation-induced cytidine  
504 deaminase-dependent DNA breaks in class switch recombination occur during G1 phase of the  
505 cell cycle and depend upon mismatch repair. *J Immunol* 179: 6064-71

506 Schwab RA, Nieminuszczy J, Shah F, Langton J, Lopez Martinez D, Liang CC, Cohn MA, Gibbons  
507 RJ, Deans AJ, Niedzwiedz W (2015) The Fanconi Anemia Pathway Maintains Genome Stability by  
508 Coordinating Replication and Transcription. *Mol Cell* 60: 351-61



Shin JH, Kelman Z (2006) The replicative helicases of bacteria, archaea, and eukarya can unwind RNA-DNA hybrid substrates. *J Biol Chem* 281: 26914-21

Singh TR, Bakker ST, Agarwal S, Jansen M, Grassman E, Godthelp BC, Ali AM, Du CH, Rooimans MA, Fan Q, Wahengbam K, Steltenpool J, Andreassen PR, Williams DA, Joenje H, de Winter JP, Meetei AR (2009) Impaired FANCD2 monoubiquitination and hypersensitivity to camptothecin uniquely characterize Fanconi anemia complementation group M. *Blood* 114: 174-80

Singleton MR, Scaife S, Raven ND, Wigley DB (2001) Crystallization and preliminary X-ray analysis of RecG, a replication-fork reversal helicase from *Thermotoga maritima* complexed with a three-way DNA junction. *Acta crystallographica Section D, Biological crystallography* 57: 1695-6

Sollier J, Cimprich KA (2015) Breaking bad: R-loops and genome integrity. *Trends Cell Biol* 25: 514-22

Sollier J, Stork CT, Garcia-Rubio ML, Paulsen RD, Aguilera A, Cimprich KA (2014) Transcription-coupled nucleotide excision repair factors promote R-loop-induced genome instability. *Mol Cell* 56: 777-85

Stork CT, Bocek M, Crossley MP, Sollier J, Sanz LA, Chedin F, Swigut T, Cimprich KA (2016) Co-transcriptional R-loops are the main cause of estrogen-induced DNA damage. *eLife* 5

Sun W, Nandi S, Osman F, Ahn JS, Jakovleska J, Lorenz A, Whitby MC (2008) The FANCM ortholog Fml1 promotes recombination at stalled replication forks and limits crossing over during DNA double-strand break repair. *Mol Cell* 32: 118-28

Sutherland JH, Tse-Dinh YC (2010) Analysis of RuvABC and RecG involvement in the *Escherichia coli* response to the covalent topoisomerase-DNA complex. *J Bacteriol* 192: 4445-51

Szczelkun MD, Tikhomirova MS, Sinkunas T, Gasiunas G, Karvelis T, Pschera P, Siksnys V, Seidel R (2014) Direct observation of R-loop formation by single RNA-guided Cas9 and Cascade effector complexes. *Proc Natl Acad Sci U S A* 111: 9798-803

Vincent SD, Mahdi AA, Lloyd RG (1996) The RecG branch migration protein of *Escherichia coli* dissociates R-loops. *J Mol Biol* 264: 713-21

Wan Y, Zheng X, Chen H, Guo Y, Jiang H, He X, Zhu X, Zheng Y (2015) Splicing function of mitotic regulators links R-loop-mediated DNA damage to tumor cell killing. *J Cell Biol* 209: 235-46

Wang Y, Leung Justin W, Jiang Y, Lowery Megan G, Do H, Vasquez Karen M, Chen J, Wang W, Li L (2013) FANCM and FAAP24 Maintain Genome Stability via Cooperative as Well as Unique Functions. *Molecular cell* 49: 997-1009

Whitby MC (2010) The FANCM family of DNA helicases/translocases. *DNA Repair (Amst)* 9: 224-36

Wilson-Sali T, Hsieh T-s (2002) Preferential cleavage of plasmid-based R-loops and D-loops by *Drosophila* topoisomerase III $\beta$ . *Proceedings of the National Academy of Sciences* 99: 7974-7979

Xue Y, Li Y, Guo R, Ling C, Wang W (2008) FANCM of the Fanconi anemia core complex is required for both monoubiquitination and DNA repair. *Hum Mol Genet*

Yuce O, West SC (2013) Senataxin, defective in the neurodegenerative disorder ataxia with oculomotor apraxia 2, lies at the interface of transcription and the DNA damage response. *Mol Cell Biol* 33: 406-17

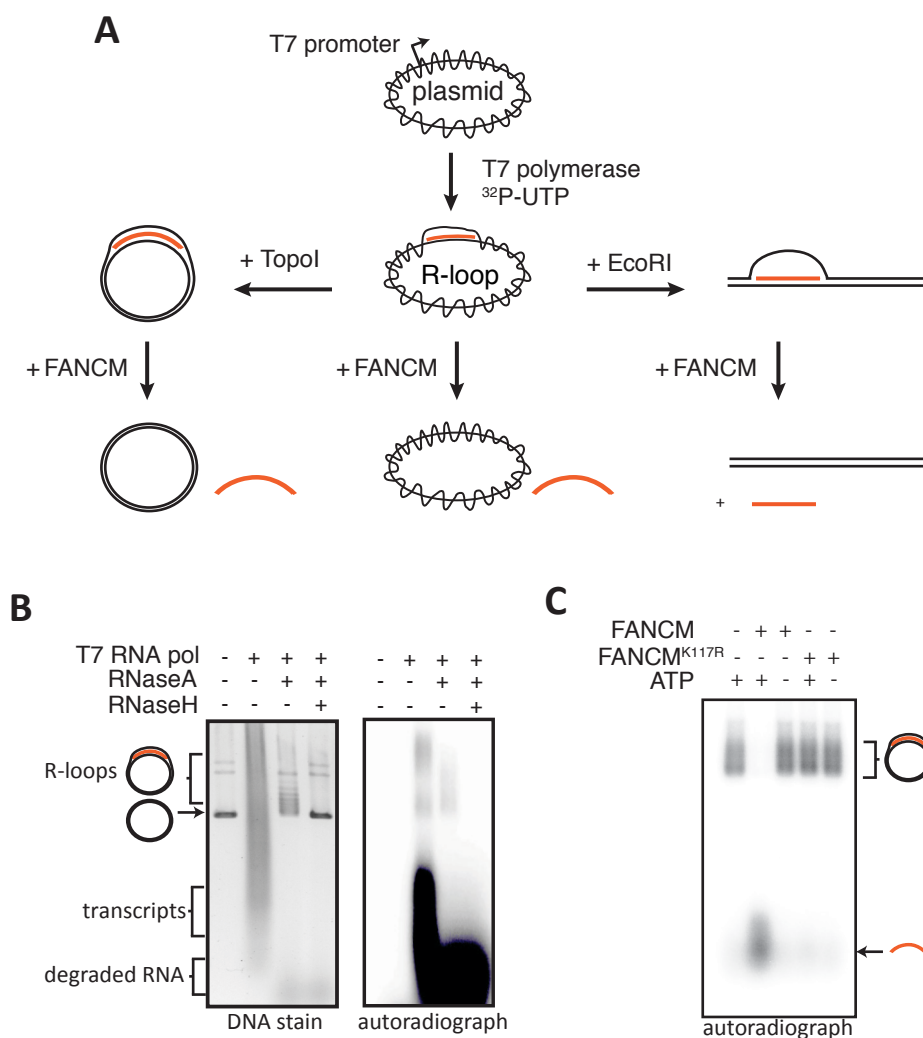

**Figure 1: Generation of co-transcriptional R-loops in vitro and their processing by FANCM-FAAP24.** A) Schematic of method used to generate and unwind R-loops of different topological states. DNA is coloured black and RNA orange. B) Plasmid based R-loops observed by gel electrophoresis. Sybr gold stain of plasmid DNA molecules reveals the topological changes to the plasmid DNA upon R-loop formation. Right panel is an autoradiograph identifying the  $^{32}\text{P}$ -UTP incorporation into R-loop, transcripts or post-RNase treatment. C) Autoradiograph showing FANCM-FAAP24 (1nM) unwinding purified R-loops (1nM) in an ATP dependent manner. FANCM<sup>K117R</sup> is a translocase activity deficient mutant.

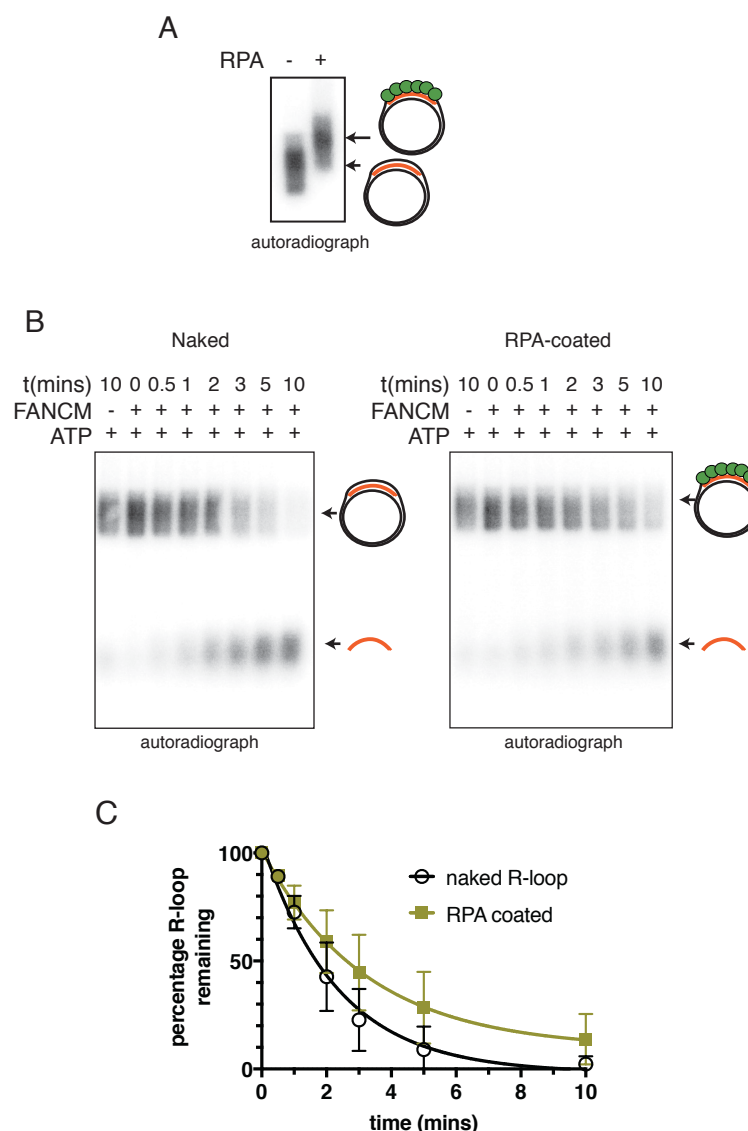

**Figure 2: FANCM-FAAP24 acts on protein coated R-loops.**

A) Autoradiograph of an EMSA showing RPA bound to plasmid based R-loops. B) Representative Autoradiographs of time course assays of FANCM (0.25nM) activity on naked R-loops (1nM, left panel) versus RPA coated R-loops (1nM right panel) C) Quantification of unwinding activity ( $\pm$  stderr) from  $n > 3$  experiments.

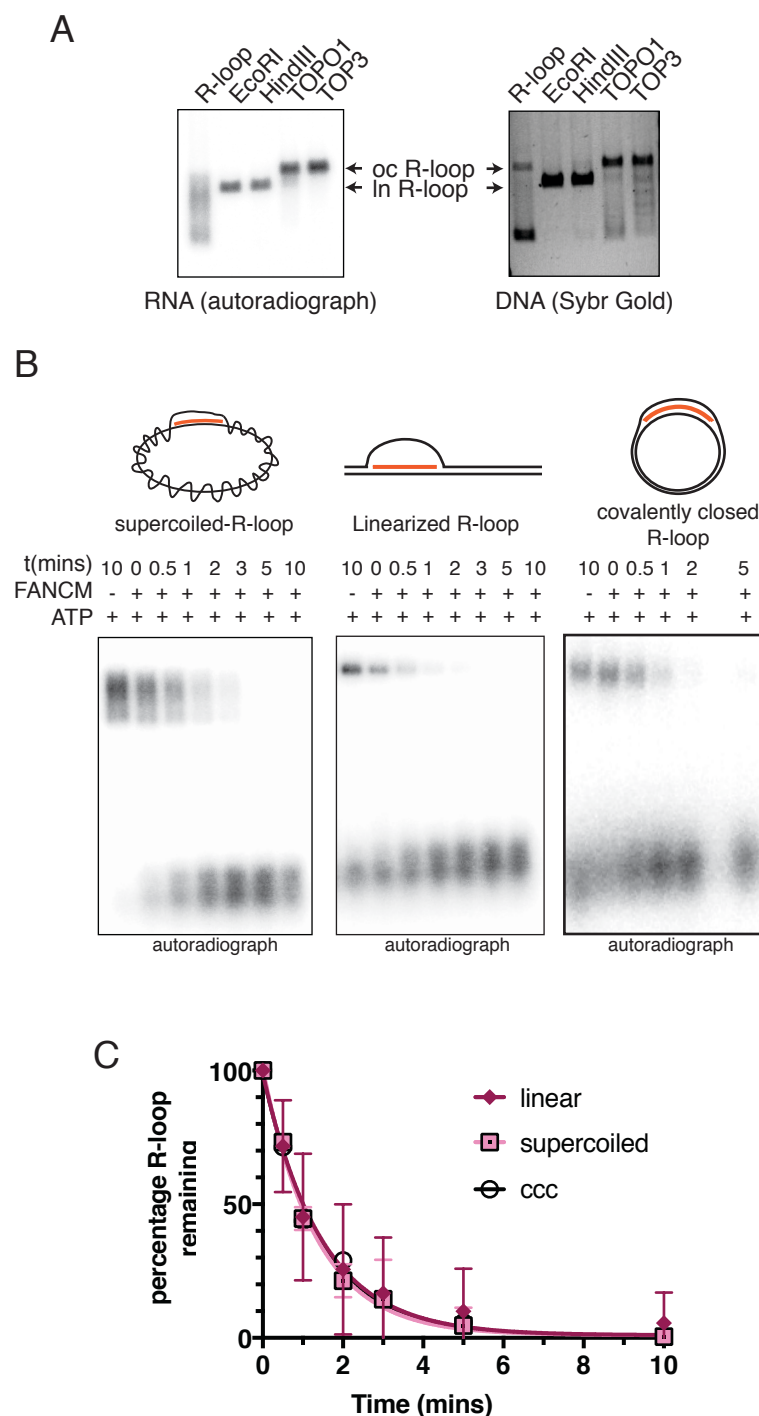

**Figure 3: FANCM unwinds R-loops with different DNA topologies**

A) Characterization of topological isoforms of plasmid based R-loops after generation of linear form by restriction enzyme digestion by EcoRI or HindIII, or covalently closed circle form (ccc) by topoisomerases 1 or III treatment. Left panel is an autoradiograph depicting the RNA molecules. The right panel is sybr gold stain of the DNA molecules. B) Autoradiographs of time course assays of plasmid (left panel) versus linear (middle panel) based R-loops. The graph is the average (n=3) % of R-loop unwound (y-axis) of each time point (x-axis) with standard error bars. Final concentrations of R-loops and FANCM for these assays was 1nM and 0.25nM respectively.

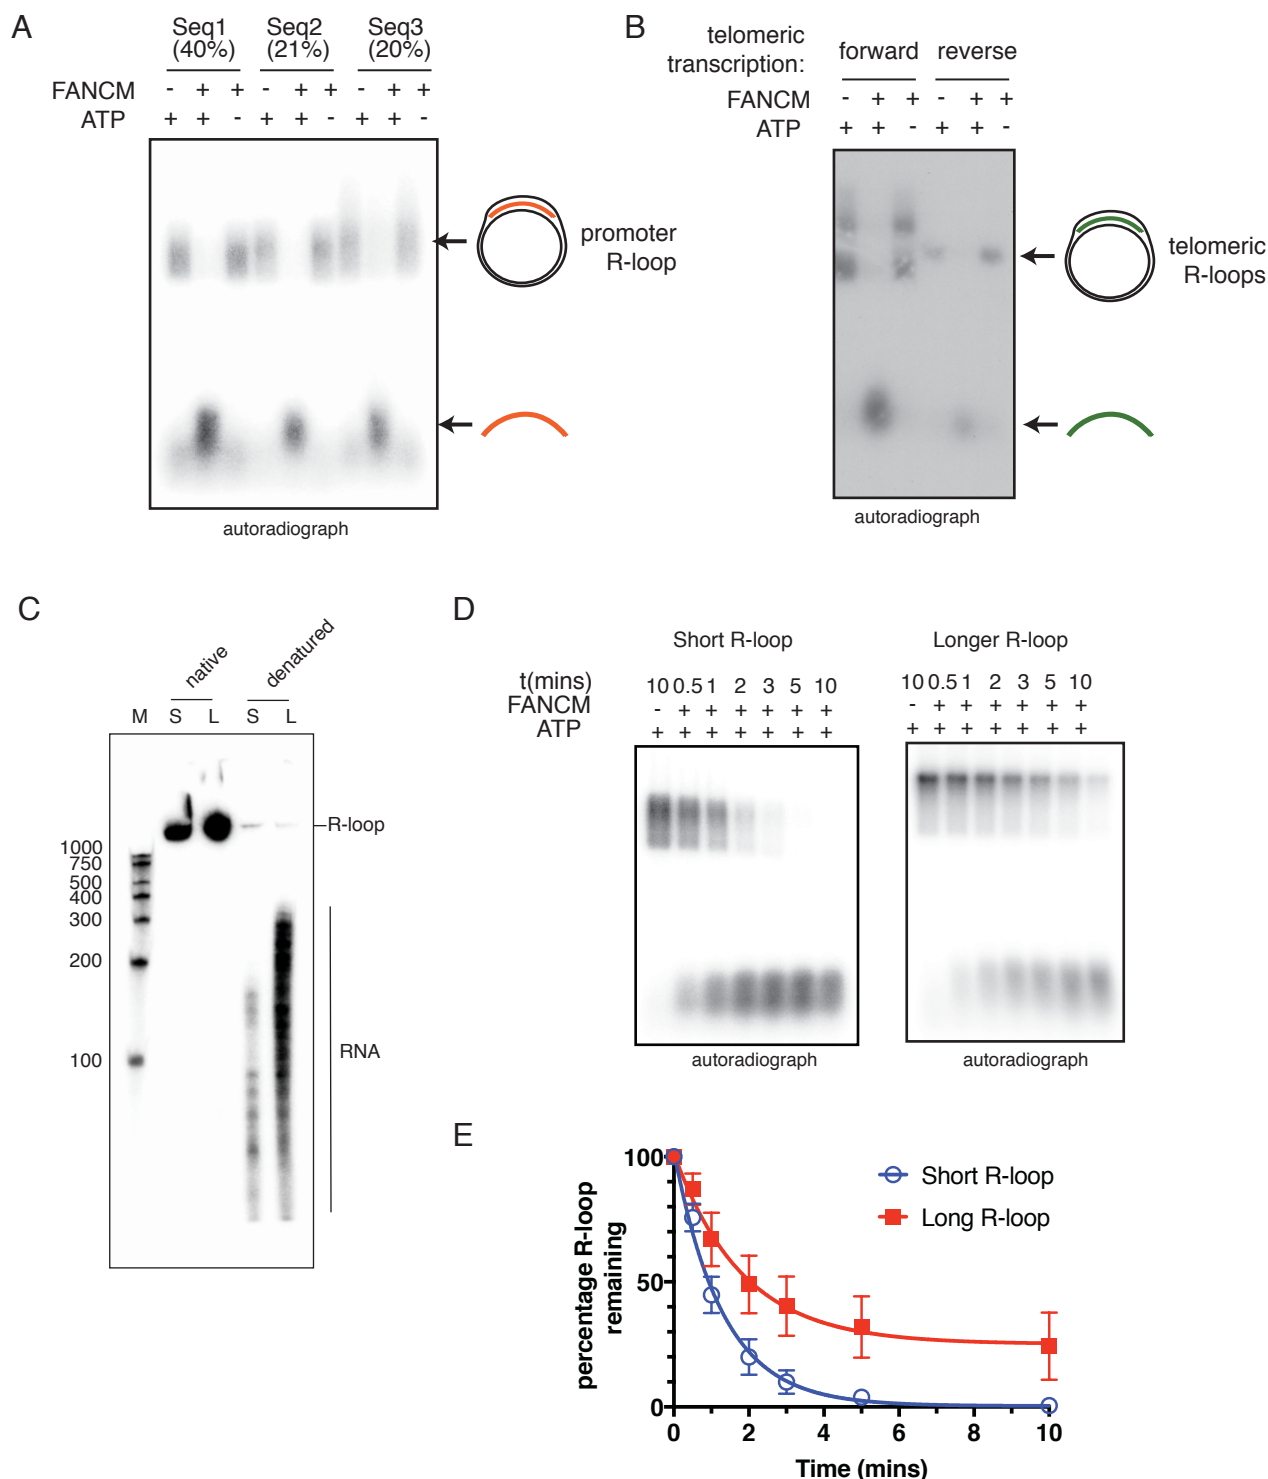

**Figure 4: FANCM-FAAP24 can process R-loops irrespective of sequence, length or genomic origin.** A) R-loop processing assay with three independently derived R-loop forming sequences. The GC skew % of each sequence is indicated in brackets above the autoradiograph. B) R-loops can be formed by *in vitro* transcription in a forward or reverse direction through a 1.4kb telomeric repeat sequence. FANCM:FAAP24 was tested against both products. C) R-loops of similar sequence but different length were generated (see materials and methods) and shown to produce trapped RNA species of different sizes on a PAGE gel. Short (S) and long (L) plasmid based R-loops are shown in native or denatured states. D-E) Substrates from C were incubated in a representative timecourse with FANCM:FAAP24 and R-loop remaining plotted from an average of 3 experiments ( $\pm$ stderr).

A) Domain organization of FANCM orthologs, and BLM showing conserved domains. For FANCM, interaction sites are shown for: MHF=MHF1/2 complex, FAcc=Fanconi anemia core complex, TRR=Top3A-RMI1-RMI2 complex. B) MPH1 and RecG (1nM) unwind plasmid based R-loops in an ATP dependent manner, in a 10 minute reaction. C) FANCM (1nM) 1-800 retains the ability to unwind R-loops *in vitro*. D) Autoradiograph showing BLM unwinding plasmid based R-loops is ATP dependent but less efficient than FANCM. The concentrations of BLM used was 1, 10, 20, 40, 40nM (lane2-6) or 1nM for FANCM-FAAP24 (lane7-8) .

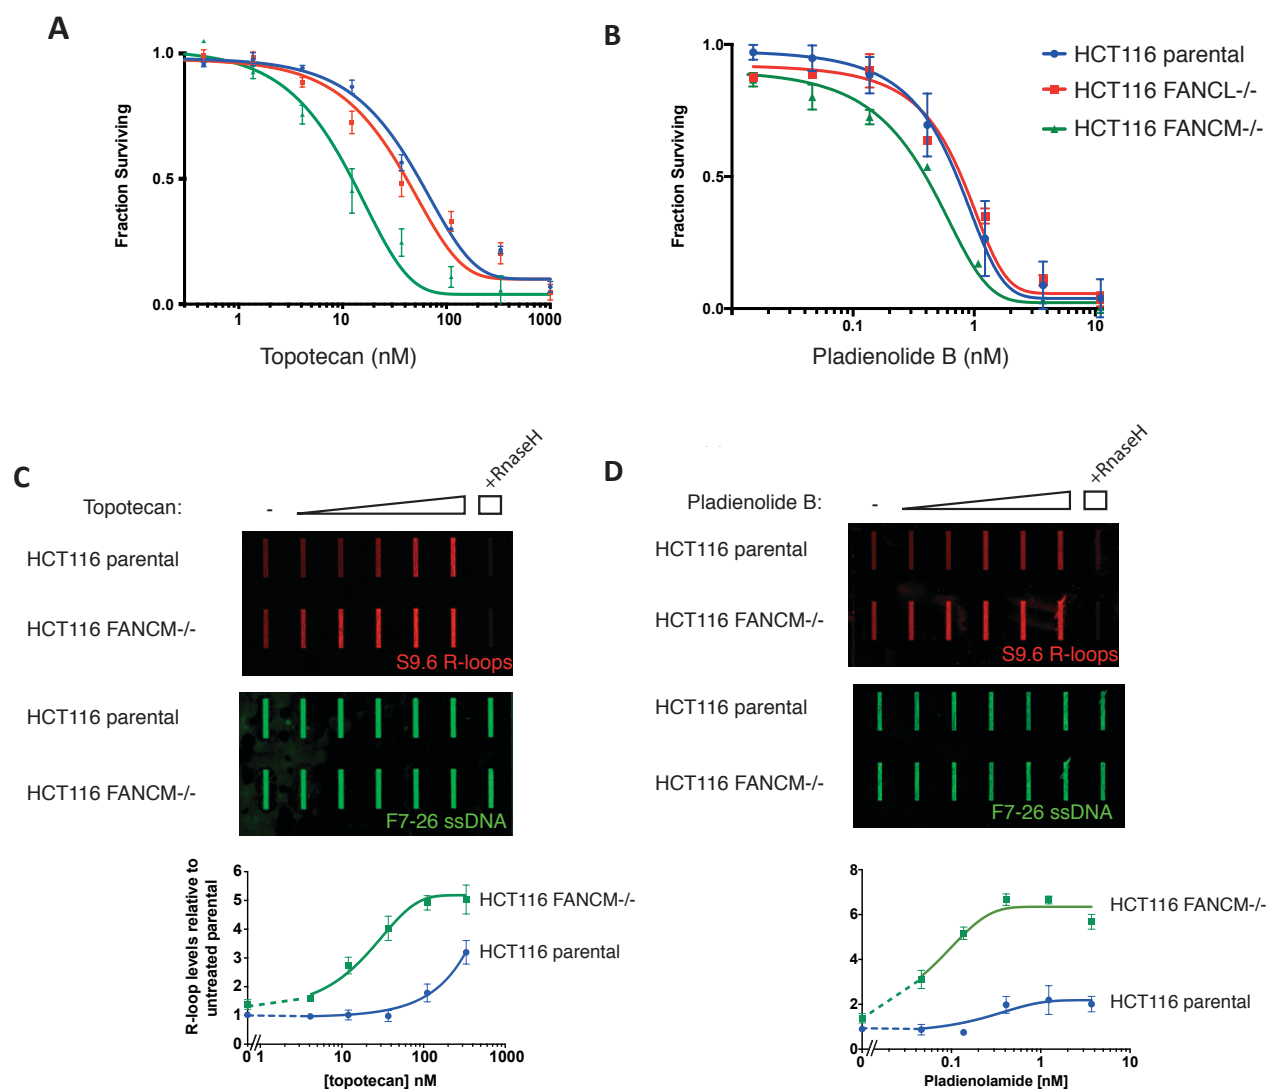

## Figure 6 FANCM deficient cells are sensitive to R-loop stabilizing compounds

A-B) Dose response curves of parental and FANCM-/- HCT116 cell lines exposed to topotecan (left) or pladienolide B (right) for 72hours and stained with sulforhodamine B. C-D) Total R-loop levels measured by slot blotting of HCT116 genomic DNA extracted after increasing dose of topotecan or pladienolide B. Blots were probed with S9.6 anti-DNA:RNA hybrid or F7-26 anti-DNA, far-red secondary antibodies and detected by LiCor Odyssey imaging. RNaseH treated genomic DNA was used as a control for S9.6 DNA:RNA hybrid specificity. Quantification of S9.6 versus F7-26 slot blot signal from 3 experiments +/- sterr is shown in graphed form.

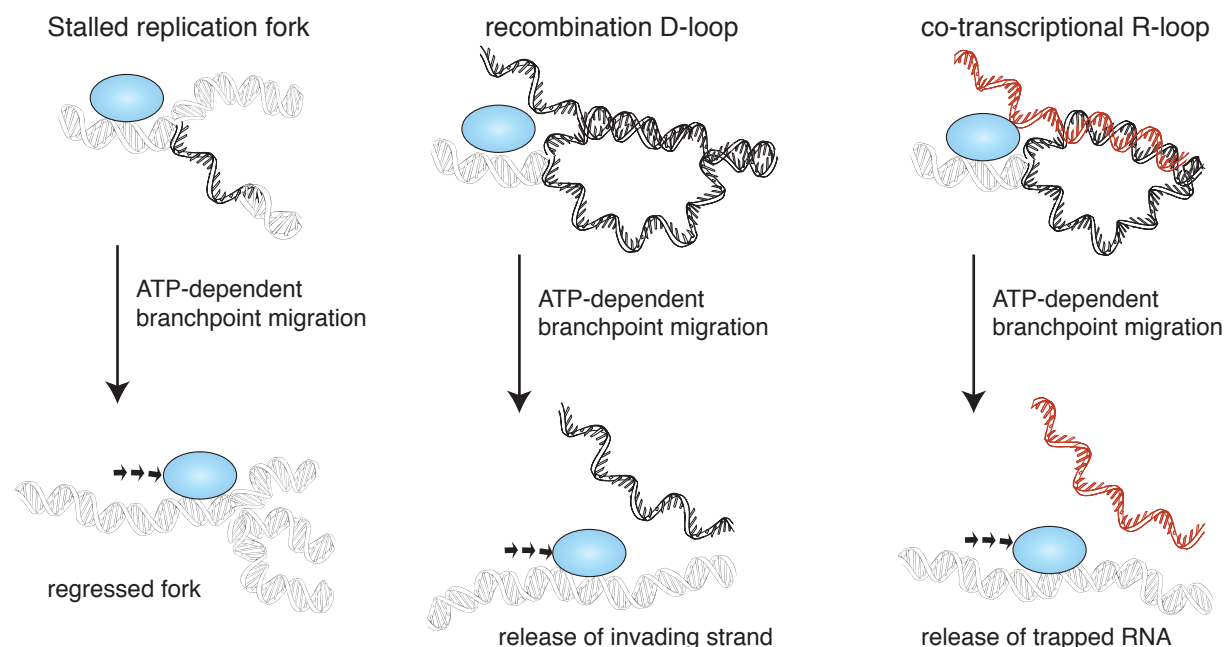

**Figure 7 Model for FANCM-family-mediated maintenance of genome stability by a common mechanism of branchpoint translocation:**

Branchpoint translocation is indicated for 3 different DNA structures associated with genome instability. FANCM/Mph1/RecG or other family member (blue sphere in cartoon) binds specifically to junction structure in DNA. This engages the motor activity of the enzyme, to continuously push the junction. For a stalled replication fork (left) this leads to formation of a regressed fork, as the nascent DNA strands anneal. For a D-loop or R-loop, branchpoint migration leads to displacement of a ssDNA or RNA molecule respectively.
